# Supplementary material for: Immunomodulatory multicellular scaffolds for tendon-to-bone regeneration
Source: PubMed Central journal article supplement — Sci Adv. 2024 Mar 8;10(10):eadk6610. doi: 10.1126/sciadv.adk6610 (PMC10923514; doi:10.1126/sciadv.adk6610), 2024-03-08
Supplement: sciadv.adk6610_sm.pdf [file sciadv.adk6610_sm.pdf]

Supplementary Materials for  
**Immunomodulatory multicellular scaffolds for tendon-to-bone regeneration**

Lin Du *et al.*

Correspondence author. Chengtie Wu, [chengtiewu@mail.sic.ac.cn](mailto:chengtiewu@mail.sic.ac.cn)

*Sci. Adv.* **10**, eadk6610 (2024)  
DOI: 10.1126/sciadv.adk6610

**The PDF file includes:**

Figs. S1 to S7  
Table S1  
Legend for movie S1  
References

**Other Supplementary Material for this manuscript includes the following:**

Movie S1

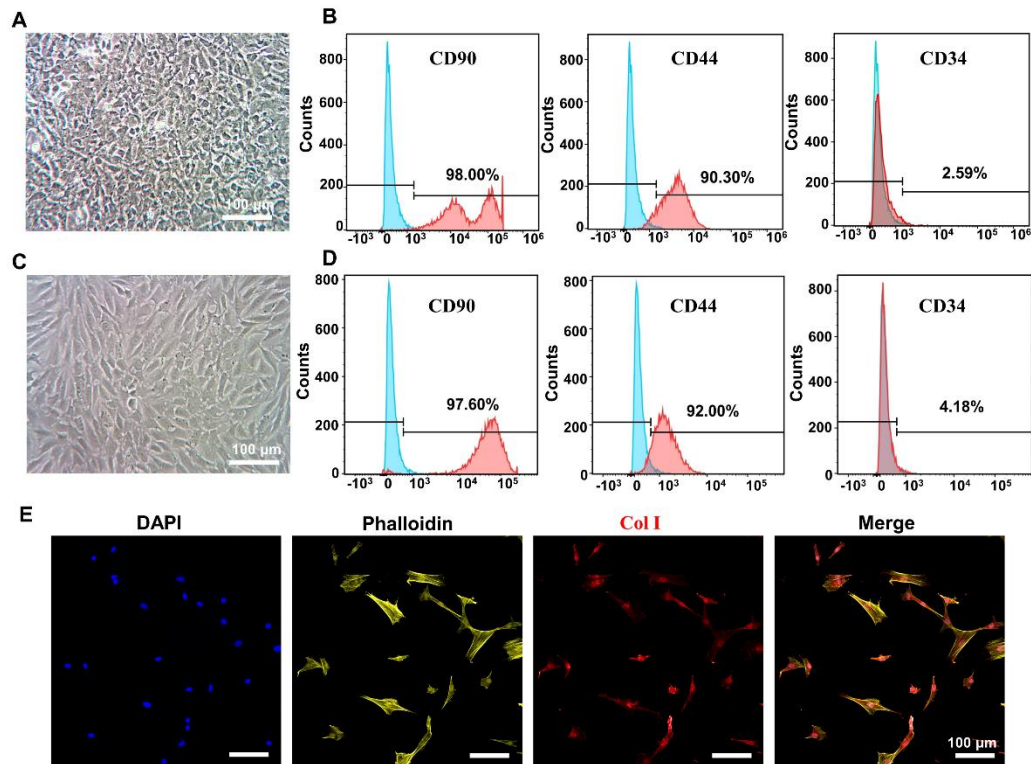

**Figure S1.** (A) The morphology and (B) surface marker expression (related to mesenchymal/hematopoietic stem cells) of bone marrow mesenchymal stem cells (BMSCs). (C) The morphology and (D) surface marker expression (related to mesenchymal/hematopoietic stem cells) of tendon stem/progenitor cells (TSPCs). (E) Immunofluorescence staining images of Col I protein expressed by primary TSPCs. **Both BMSCs and TSPCs adhered to the culture dish and possessed the morphological characteristics of mesenchymal stem cells. Besides, all TSPCs expressed high level of type I collagen, which was consistent with the previous work.(80) The above results demonstrated the successful isolation of BMSCs and TSPCs.**

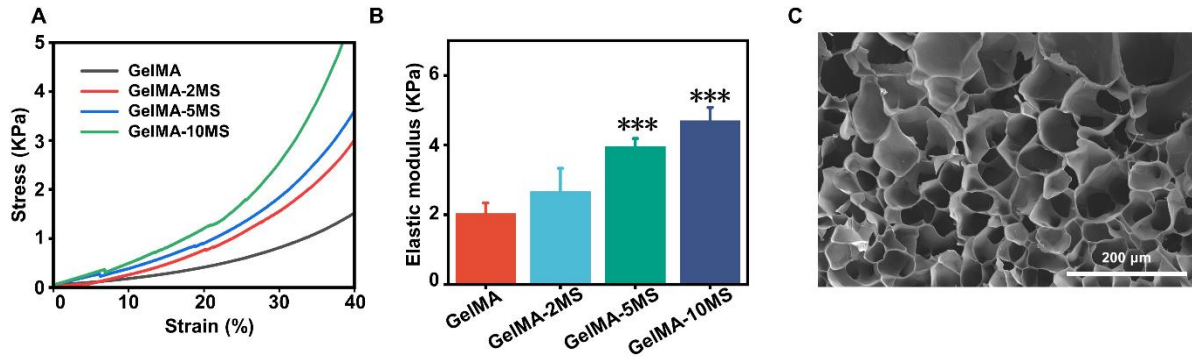

**Figure S2.** (A) The stress-strain curve and (B) elastic modulus of scaffolds with different contents of MS nanoparticles ( $n = 4$ ). (C) SEM images of GelMA-5MS bioink.  $*p < 0.05$ ,  $**p < 0.01$ ,  $***p < 0.001$ . **The incorporation of MS nanoparticles increased the mechanical strength of GelMA hydrogel but did not affect their porous structure.**

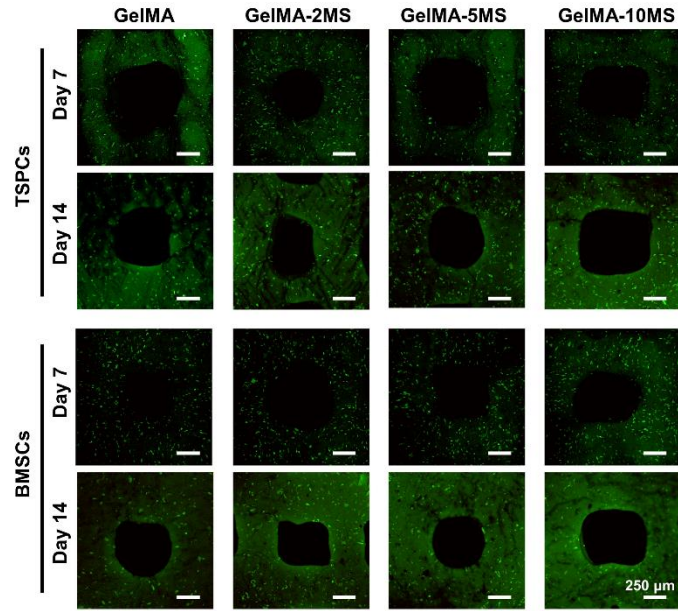

**Figure S3.** Live/dead staining images of TSPCs and BMSCs in multicellular scaffolds containing different concentrations of MS nanoparticles after cultured for 7 and 14 days.

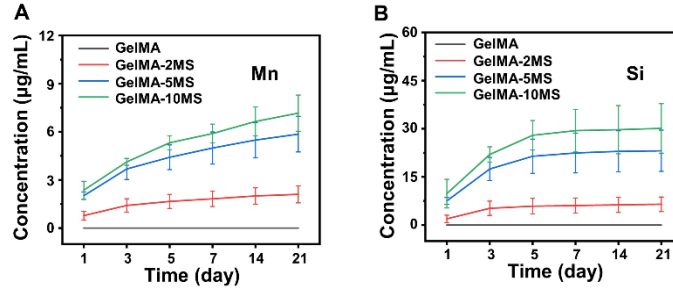

**Figure S4.** (A) Mn ions and (B) Si ions release curves of multicellular scaffolds containing different concentration of MS nanoparticles ( $n = 4$ ) **indicated that multicellular scaffolds based on MS nanoparticles could release Mn and Si ions stably during 21-day culture period.** \* $p < 0.05$ , \*\* $p < 0.01$ , \*\*\* $p < 0.001$ .

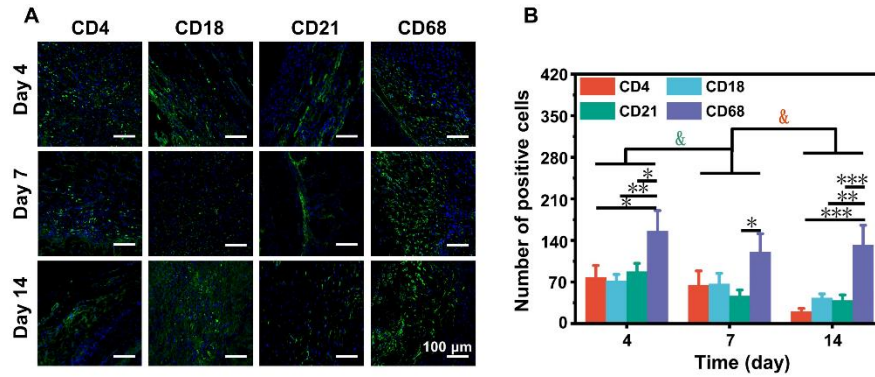

**Figure S5. The number statistics of immune cells surrounding the damaged regions after implantation of GelMA-cells-MS scaffold.** (A) Immunofluorescence staining images of CD4 (T cells marker), CD18 (neutrophils marker), CD21 (B cells marker) and CD68 (macrophages marker) at day 4, 7 and 14 after surgery. (B) The corresponding number statistics of T cells, neutrophils, B cells and macrophages ( $n = 3$ ).  $*p < 0.05$ ,  $**p < 0.01$ ,  $***p < 0.001$  (comparing the expression of different marks at the same time points).  $&p < 0.05$ ,  $&&p < 0.01$ ,  $&&&p < 0.001$  (comparing the expression of the same mark at different time points. Red: CD4; Blue: CD18; Green: CD21; Purple: CD68).

A

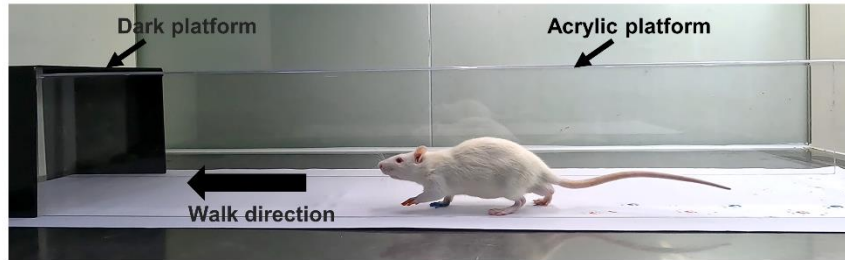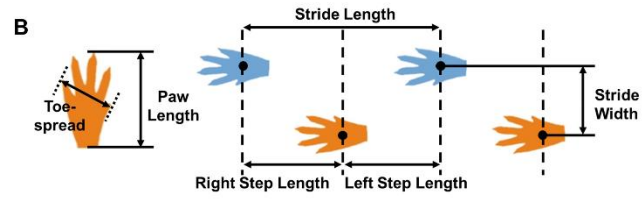

**Figure S6.** (A) Walking apparatus for recording rat pawprints. (B) Schematic diagram of paw and gait parameters.

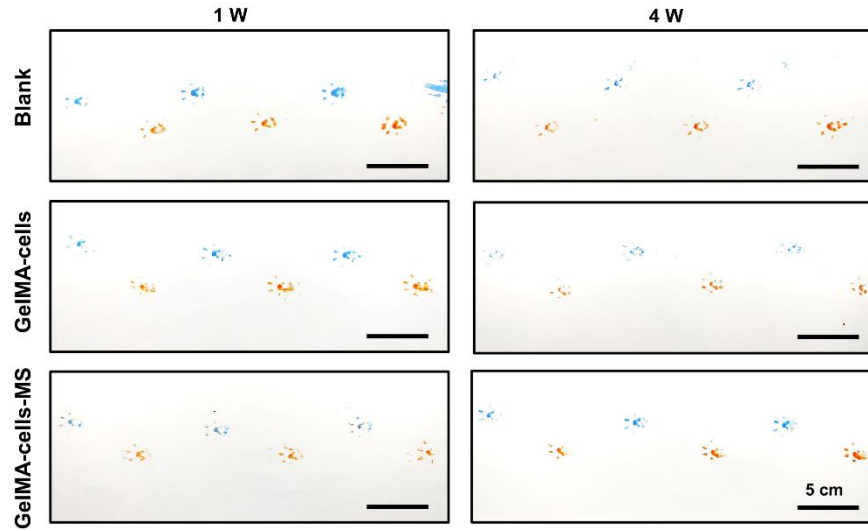

**Figure S7.** Pawprints of rats in the Blank, GelMA-cells, and GelMA-cells-MS groups at 1 and 4 weeks postoperatively.



**Table S1. The primer sequences used for RT-qPCR assays.**

The primer sequences of tenogenic and osteogenic genes.

| Gene         |         | Primer sequence        |
|--------------|---------|------------------------|
| <i>GAPDH</i> | Forward | TCACCATCTTCCAGGAGCGA   |
| <i>GAPDH</i> | Reverse | CACAATGCCGAAGTGGTCGT   |
| <i>Runx2</i> | Forward | CCTCTGACTTCTGCCTCTGG   |
| <i>Runx2</i> | Reverse | GATGAAATGCCTGGGAACTG   |
| <i>OCN</i>   | Forward | ACAAGTCCCACACAGCAACTC  |
| <i>OCN</i>   | Reverse | CCAGGTCAGAGAGGCAGAAT   |
| <i>OPN</i>   | Forward | GAGACCGTCTGAAACAGCGT   |
| <i>OPN</i>   | Reverse | AACCACTGCCAGTCTCATGG   |
| <i>BMP2</i>  | Forward | GAGGAGAAGCCAGGTGTCT    |
| <i>BMP2</i>  | Reverse | GTCCACATACAAAGGGTGC    |
| <i>BSP</i>   | Forward | GAATCCACATGCCTATTGC    |
| <i>BSP</i>   | Reverse | AGAACCCACTGACCCATT     |
| <i>TNC</i>   | Forward | CGTGAAAAACAATACCCGAGGC |
| <i>TNC</i>   | Reverse | GCCGTAGGAGAGTTCAATGCC  |
| <i>DCN</i>   | Forward | ACTGGGCACCAACCCTCTGA   |
| <i>DCN</i>   | Reverse | ATCTGAAGGTGGATGGCTGGA  |
| <i>BGN</i>   | Forward | GATGGCCTGAAGCTCAA      |
| <i>BGN</i>   | Reverse | GGGTTGTTGAAGAGGCTG     |

The primer sequences of macrophage phenotype-related genes.

| <b>Gene</b>                   |         | <b>Primer sequence</b>   |
|-------------------------------|---------|--------------------------|
| <i>GAPDH</i>                  | Forward | TCACCATCTTCCAGGAGCGA     |
| <i>GAPDH</i>                  | Reverse | CACAATGCCGAAGTGGTCGT     |
| <i>CCR7</i>                   | Forward | CCATGACGGATACCTACCTGCT   |
| <i>CCR7</i>                   | Reverse | CCCTTACACAGGTAGACGCCAA   |
| <i>iNOS</i>                   | Forward | ACGCTTCACTTCCAATGCAAC    |
| <i>iNOS</i>                   | Reverse | CAGCCTCATGGTAAACACGTTC   |
| <i>IL-6</i>                   | Forward | ATAGTCCTTCCTACCCCAATTTCC |
| <i>IL-6</i>                   | Reverse | GATGAATTGGATGGTCTTGGTCC  |
| <i>IL-1<math>\beta</math></i> | Forward | CTACCTGTGTCTTTCCCGTG     |
| <i>IL-1<math>\beta</math></i> | Reverse | TTTGTTGTTTCATCTCGGAGC    |
| <i>TNF<math>\alpha</math></i> | Forward | CTGTAGCCCACGTCGTAGCAA    |
| <i>TNF<math>\alpha</math></i> | Reverse | TGTCTTTGAGATCCATGCCGTT   |
| <i>CD206</i>                  | Forward | ATCCACGAGCAAATGTACCTCA   |
| <i>CD206</i>                  | Reverse | TAGCCAGTTCAGATACCGGAA    |
| <i>Arg-1</i>                  | Forward | ATCAACACTCCCCTGACAACC    |
| <i>Arg-1</i>                  | Reverse | TCGCAAGCCAATGTACACGAT    |
| <i>IL-10</i>                  | Forward | GAGAAGCATGGCCCAGAAATC    |
| <i>IL-10</i>                  | Reverse | GAGAAATCGATGACAGCGCC     |
| <i>IL-4</i>                   | Forward | AGATGGATGTGCCAAACGTCCTCA |
| <i>IL-4</i>                   | Reverse | AATATGCGAAGCACCTTGGAAGCC |

**Video S1. Video of gait analysis of rats in all groups at different time points.**

## REFERENCES AND NOTES

1. S. Font Tellado, E. R. Balmayor, M. Van Griensven, Strategies to engineer tendon/ligament-to-bone interface: Biomaterials, cells and growth factors. *Adv. Drug Deliv. Rev.* **94**, 126–140 (2015).
2. I. Calejo, R. Costa-Almeida, R. L. Reis, M. E. Gomes, Enthesis tissue engineering: Biological requirements meet at the interface. *Tissue Eng. Part B Rev.* **25**, 330–356 (2019).
3. H. H. Lu, S. Thomopoulos, Functional attachment of soft tissues to bone: Development, healing, and tissue engineering, in *Annual Review of Biomedical Engineering*, vol. 15, M. L. Yarmush, Ed. (Annual Reviews, 2013), pp. 201–226.
4. C. L. Zhu, J. C. Qiu, S. Thomopoulos, Y. N. Xia, augmenting tendon-to-bone repair with functionally graded scaffolds. *Adv. Healthc. Mater.* **10**, e2002269 (2021).
5. G. P. Dang, W. Qin, Q. Q. Wan, J. T. Gu, K. Y. Wang, Z. Mu, B. Gao, K. Jiao, F. R. Tay, L. N. Niu, Regulation and reconstruction of cell phenotype gradients along the tendon-bone interface. *Adv. Funct. Mater.* **33**, 2210275 (2023).
6. X. Jiang, Y. Kong, M. Kuss, J. Weisenburger, H. Haider, R. Harms, W. Shi, B. Liu, W. Xue, J. Dong, J. Xie, P. Streubel, B. Duan, 3D bioprinting of multilayered scaffolds with spatially differentiated ADMSCs for rotator cuff tendon-to-bone interface regeneration. *Appl. Mater. Today* **27**, 101510 (2022).
7. T. Lei, T. Zhang, W. Ju, X. Chen, B. C. Heng, W. Shen, Z. Yin, Biomimetic strategies for tendon/ligament-to-bone interface regeneration. *Bioact. Mater.* **6**, 2491–2510 (2021).
8. D. Zbrojkiewicz, C. Vertullo, J. E. Grayson, Increasing rates of anterior cruciate ligament reconstruction in young Australians, 2000–2015. *Med. J. Australia* **208**, 354–358 (2018).
9. B. Shiroud Heidari, R. Ruan, E. Vahabli, P. Chen, E. M. De-Juan-Pardo, M. Zheng, B. Doyle, Natural, synthetic and commercially-available biopolymers used to regenerate tendons and ligaments. *Bioact. Mater.* **19**, 179–197 (2023).

10. S. A. Rodeo, H. G. Potter, S. Kawamura, A. S. Turner, H. J. Kim, B. L. Atkinson, Biologic augmentation of rotator cuff tendon-healing with use of a mixture of osteoinductive growth factors. *J. Bone Joint Surg. Am.* **89**, 2485–2497 (2007).
11. K. Yasuda, F. Tomita, S. Yamazaki, A. Minami, H. Tohyama, The effect of growth factors on biomechanical properties of the bone-patellar tendon-bone graft after anterior cruciate ligament reconstruction - A canine model study. *Am. J. Sports Med.* **32**, 870–880 (2004).
12. X. Li, R. Cheng, Z. Sun, W. Su, G. Pan, S. Zhao, J. Zhao, W. Cui, Flexible bipolar nanofibrous membranes for improving gradient microstructure in tendon-to-bone healing. *Acta Biomater.* **61**, 204–216 (2017).
13. C. Zhu, S. Pongkitwitoon, J. Qiu, S. Thomopoulos, Y. Xia, Design and fabrication of a hierarchically structured scaffold for tendon-to-bone repair. *Adv. Mater.* **30**, e1707306 (2018).
14. R. H. Yang, G. Li, C. Y. Zhuang, P. Yu, T. J. Ye, Y. Zhang, P. Y. Shang, J. J. Huang, M. Cai, L. Wang, W. G. Cui, L. F. Deng, Gradient bimetallic ion-based hydrogels for tissue microstructure reconstruction of tendon-to-bone insertion. *Sci. Adv.* **7**, eabg3816 (2021).
15. Y. Tang, C. Chen, F. Liu, S. Xie, J. Qu, M. Li, Z. Li, X. Li, Q. Shi, S. Li, X. Li, J. Hu, H. Lu, Structure and ingredient-based biomimetic scaffolds combining with autologous bone marrow-derived mesenchymal stem cell sheets for bone-tendon healing. *Biomaterials* **241**, 119837 (2020).
16. C. Chen, Y. Chen, M. Li, H. Xiao, Q. Shi, T. Zhang, X. Li, C. Zhao, J. Hu, H. Lu, Functional decellularized fibrocartilaginous matrix graft for rotator cuff enthesis regeneration: A novel technique to avoid in-vitro loading of cells. *Biomaterials* **250**, 119996 (2020).
17. L. Bai, Q. Han, Z. Meng, B. Chen, X. Qu, M. Xu, Y. Su, Z. Qiu, Y. Xue, J. He, J. Zhang, Z. Yin, Bioprinted living tissue constructs with layer-specific, growth factor-loaded microspheres for improved enthesis healing of a rotator cuff. *Acta Biomater.* **154**, 275–289 (2022).
18. W. Su, J. Guo, J. Xu, K. Huang, J. Chen, J. Jiang, G. Xie, J. Zhao, S. Zhao, C. Ning, Gradient composite film with calcium phosphate silicate for improved tendon -to-Bone intergration. *Chem. Eng. J.* **404**, 126473 (2021).

19. S. F. Tellado, S. Chiera, W. Bonani, P. S. P. Poh, C. Migliaresi, A. Motta, E. R. Balmayor, M. van Griensven, Heparin functionalization increases retention of TGF- $\beta$ 2 and GDF5 on biphasic silk fibroin scaffolds for tendon/ligament-to-bone tissue engineering. *Acta Biomater.* **72**, 150–166 (2018).
20. J. Hou, R. Yang, I. Vuong, F. Li, J. Kong, H.-Q. Mao, Biomaterials strategies to balance inflammation and tenogenesis for tendon repair. *Acta Biomater.* **130**, 1–16 (2021).
21. J. Lin, W. Zhou, S. Han, V. Bunpetch, K. Zhao, C. Liu, Z. Yin, H. Ouyang, Cell-material interactions in tendon tissue engineering. *Acta Biomater.* **70**, 1–11 (2018).
22. E. Dagher, P. L. Hays, S. Kawamura, J. Godin, X. H. Deng, S. A. Rodeo, immobilization modulates macrophage accumulation in tendon-bone healing. *Clin. Orthop. Relat. R.* **467**, 281–287 (2009).
23. J. Lu, C. S. Chamberlain, M. L. Ji, E. E. Saether, E. M. Leiferman, W. J. Li, R. Vanderby, Tendon-to-bone healing in a rat extra-articular bone tunnel model: A comparison of fresh autologous bone marrow and bone marrow-derived mesenchymal stem cells. *Am. J. Sports Med.* **47**, 2729–2736 (2019).
24. P. T. Jensen, K. L. Lambertsen, L. H. Frich, Assembly, maturation, and degradation of the supraspinatus enthesis. *J. Shoulder Elbow Surg.* **27**, 739–750 (2018).
25. T. A. Wynn, K. M. Vannella, Macrophages in tissue repair, regeneration, and fibrosis. *Immunity* **44**, 450–462 (2016).
26. S. P. Zhang, S. J. Chuah, R. C. Lai, J. H. P. Hui, S. K. Lim, W. S. Toh, MSC exosomes mediate cartilage repair by enhancing proliferation, attenuating apoptosis and modulating immune reactivity. *Biomaterials* **156**, 16–27 (2018).
27. Z. Julier, A. J. Park, P. S. Briquez, M. M. Martino, Promoting tissue regeneration by modulating the immune system. *Acta Biomater.* **53**, 13–28 (2017).
28. H. H. Gao, L. R. Wang, H. C. Jin, Z. Q. Lin, Z. Y. Li, Y. H. Kang, Y. Lyu, W. Q. Dong, Y. F. Liu, D. Y. Shi, J. Jiang, J. Z. Zhao, Regulating macrophages through immunomodulatory biomaterials is a promising strategy for promoting tendon-bone healing. *J. Funct. Biomater.* **13**, 243 (2022).

29. K. Zheng, W. Niu, B. Lei, A. R. Boccaccini, Immunomodulatory bioactive glasses for tissue regeneration. *Acta Biomater.* **133**, 168–186 (2021).
30. B. Choi, C. Lee, J.-W. Yu, Distinctive role of inflammation in tissue repair and regeneration. *Arch. Pharm. Res.* **46**, 78–89 (2023).
31. C. Qin, J. Ma, L. Chen, H. Ma, H. Zhuang, M. Zhang, Z. Huan, J. Chang, N. Ma, C. Wu, 3D bioprinting of multicellular scaffolds for osteochondral regeneration. *Mater. Today* **49**, 68–84 (2021).
32. H. J. Zhang, C. Qin, M. Zhang, Y. H. Han, J. G. Ma, J. F. Wu, Q. Q. Yao, C. T. Wu, Calcium silicate nanowires-containing multicellular bioinks for 3D bioprinting of neural-bone constructs. *Nano Today* **46**, 101584 (2022).
33. J. Ma, C. Qin, J. Wu, H. Zhuang, L. Du, J. Xu, C. Wu, 3D multicellular micropatterning biomaterials for hair regeneration and vascularization. *Mater. Horiz.* **10**, 3773–3784 (2023).
34. L. Du, C. Qin, H. J. Zhang, F. Han, J. M. Xue, Y. F. Wang, J. F. Wu, Y. Xiao, Z. G. Huan, C. T. Wu, Multicellular bioprinting of biomimetic inks for tendon-to-bone regeneration. *Adv. Sci.* **10**, 2301309 (2023).
35. C. Qin, H. Zhang, L. Chen, M. Zhang, J. Ma, H. Zhuang, Z. Huan, Y. Xiao, C. Wu, Cell-laden scaffolds for vascular-innervated bone regeneration. *Adv. Healthc. Mater.* **12**, e2201923 (2023).
36. J. Wu, C. Qin, J. Ma, H. Zhang, J. Chang, L. Mao, C. Wu, An immunomodulatory bioink with hollow manganese silicate nanospheres for angiogenesis. *Appl. Mater. Today* **23**, 101015 (2021).
37. S. Chae, Y. Sun, Y. J. Choi, D. H. Ha, I. Jeon, D.-W. Cho, 3D cell-printing of tendon-bone interface using tissue-derived extracellular matrix bioinks for chronic rotator cuff repair. *Biofabrication* **13**, abd159 (2021).
38. T. K. Merceron, M. Burt, Y. J. Seol, H. W. Kang, S. J. Lee, J. J. Yoo, A. Atala, A 3D bioprinted complex structure for engineering the muscle-tendon unit. *Biofabrication* **7**, 035003 (2015).

39. L. Chen, C. Deng, J. Li, Q. Yao, J. Chang, L. Wang, C. Wu, 3D printing of a lithium-calcium-silicate crystal bioscaffold with dual bioactivities for osteochondral interface reconstruction. *Biomaterials* **196**, 138–150 (2019).
40. H. Zhang, W. Ma, H. Ma, C. Qin, J. Chen, C. Wu, Spindle-like zinc silicate nanoparticles accelerating innervated and vascularized skin burn wound healing. *Adv. Healthc. Mater.* **11**, e2102359 (2022).
41. J. Ma, C. Qin, J. Wu, H. Zhang, H. Zhuang, M. Zhang, Z. Zhang, L. Ma, X. Wang, B. Ma, J. Chang, C. Wu, 3D printing of strontium silicate microcylinder-containing multicellular biomaterial inks for vascularized skin regeneration. *Adv. Healthc. Mater.* **10**, e2100523 (2021).
42. Q. Yu, J. Chang, C. Wu, Silicate bioceramics: From soft tissue regeneration to tumor therapy. *J. Mater. Chem. B* **7**, 5449–5460 (2019).
43. C. T. Wu, J. Chang, A review of bioactive silicate ceramics. *Biomed. Mater.* **8**, 032001 (2013).
44. A. M. Brokesh, A. K. Gaharwar, Inorganic biomaterials for regenerative medicine. *ACS Appl. Mater. Interfaces* **12**, 5319–5344 (2020).
45. F. B. Bagambisa, U. Joos, Preliminary studies on the phenomenological behaviour of osteoblasts cultured on hydroxyapatite ceramics. *Biomaterials* **11**, 50–56 (1990).
46. X. Z. Liu, Y. E. Li, S. Wang, M. K. Lu, J. Zou, Z. M. Shi, B. B. Xu, W. Wang, B. Hu, T. Jin, F. Wu, S. Liu, C. Y. Fan, PDGF-loaded microneedles promote tendon healing through p38/cyclin D1 pathway mediated angiogenesis. *Mater. Today Bio* **16**, 100428 (2022).
47. W. Y. Zhai, H. X. Lu, C. T. Wu, L. Chen, X. T. Lin, K. Naoki, G. P. Chen, J. Chang, Stimulatory effects of the ionic products from Ca-Mg-Si bioceramics on both osteogenesis and angiogenesis in vitro. *Acta Biomater.* **9**, 8004–8014 (2013).
48. L. L. Ouyang, J. P. K. Armstrong, Q. Chen, Y. Y. Lin, M. M. Stevens, Void-Free 3D bioprinting for in situ endothelialization and microfluidic perfusion. *Adv. Funct. Mater.* **30**, 1908349 (2020).



49. S. Zhang, W. Ju, X. Chen, Y. Zhao, L. Feng, Z. Yin, X. Chen, Hierarchical ultrastructure: An overview of what is known about tendons and future perspective for tendon engineering. *Bioact. Mater.* **8**, 124–139 (2022).
50. C. Shukunami, A. Takimoto, M. Oro, Y. Hiraki, Scleraxis positively regulates the expression of tenomodulin, a differentiation marker of tenocytes. *Dev. Biol.* **298**, 234–247 (2006).
51. D. Docheva, E. B. Hunziker, R. Fässler, O. Brandau, Tenomodulin is necessary for tenocyte proliferation and tendon maturation. *Mol. Cell. Biol.* **25**, 699–705 (2005).
52. A. Corsi, T. Xu, X. D. Chen, A. Boyde, J. Liang, M. Mankani, B. Sommer, R. V. Iozzo, I. Eichstetter, P. G. Robey, P. Bianco, M. F. Young, Phenotypic effects of biglycan deficiency are linked to collagen fibril abnormalities, are synergized by decorin deficiency, and mimic Ehlers-Danlos-like changes in bone and other connective tissues. *J. Bone Miner. Res.* **17**, 1180–1189 (2009).
53. G. Zhang, Y. Ezura, I. Chervoneva, P. S. Robinson, D. P. Beason, E. T. Carine, L. J. Soslowsky, R. V. Iozzo, D. E. Birk, Decorin regulates assembly of collagen fibrils and acquisition of biomechanical properties during tendon development. *J. Cell. Biochem.* **98**, 1436–1449 (2006).
54. S. Kalamajski, A. Aspberg, K. Lindblom, D. Heinegård, Å. Oldberg, Asporin competes with decorin for collagen binding, binds calcium and promotes osteoblast collagen mineralization. *Biochem. J.* **423**, 53–59 (2009).
55. K. Xu, Y. B. Shao, Y. Xia, Y. N. Qian, N. Jiang, X. Q. Liu, L. Yang, C. L. Wang, Tenascin-C regulates migration of SOX10 tendon stem cells via integrin- $\alpha 9$  for promoting patellar tendon remodeling. *Biofactors* **47**, 768–777 (2021).
56. S. Chae, U. Yong, W. Park, Y. M. Choi, I. H. Jeon, H. Kang, J. Jang, H. S. Choi, D. W. Cho, 3D cell-printing of gradient multi-tissue interfaces for rotator cuff regeneration. *Bioact. Mater.* **19**, 611–625 (2023).
57. P. Cheng, P. Han, C. Zhao, S. Zhang, H. Wu, J. Ni, P. Hou, Y. Zhang, J. Liu, H. Xu, S. Liu, X. Zhang, Y. Zheng, Y. Chai, High-purity magnesium interference screws promote fibrocartilaginous entheses

regeneration in the anterior cruciate ligament reconstruction rabbit model via accumulation of BMP-2 and VEGF. *Biomaterials* **81**, 14–26 (2016).

58. M. Su, Q. Zhang, Y. Zhu, S. Wang, J. Lv, J. Sun, P. Qiu, S. Fan, K. Jin, L. Chen, X. Lin, Preparation of decellularized triphasic hierarchical bone-fibrocartilage-tendon composite extracellular matrix for enthesis regeneration. *Adv. Healthc. Mater.* **8**, e1900831 (2019).
59. Z. Chen, M. C. Jin, H. Y. He, J. B. Dong, J. Li, J. B. Nie, Z. C. Wang, J. T. Xu, F. Wu, Mesenchymal stem cells and macrophages and their interactions in tendon-bone healing. *J. Orthop. Transl.* **39**, 63–73 (2023).
60. Q. Zhou, W. Wang, F. J. Yang, H. Wang, X. D. Zhao, Y. Q. Zhou, P. L. Fu, Y. Z. Xu, Corrigendum: Disulfiram suppressed peritendinous fibrosis through inhibiting macrophage accumulation and its pro-inflammatory properties in tendon bone healing. *Front. Bioeng. Biotechnol.* **10**, 1054283 (2022).
61. D. Ma, J. Wang, M. Zheng, Y. Zhang, J. Huang, W. Li, Y. Ding, Y. Zhang, S. Zhu, L. Wang, X. Wu, S. Guan, Degradation behavior of ZE21C magnesium alloy suture anchors and their effect on ligament-bone junction repair. *Bioact. Mater.* **26**, 128–141 (2023).
62. M. E. Brown, J. L. Puetzer, Driving native-like zonal enthesis formation in engineered ligaments using mechanical boundary conditions and  $\beta$ -tricalcium phosphate. *Acta Biomater.* **140**, 700–716 (2022).
63. F. Han, T. Li, M. M. Li, B. J. Zhang, Y. F. Wang, Y. F. Zhu, C. T. Wu, Nano-calcium silicate mineralized fish scale scaffolds for enhancing tendon-bone healing. *Bioact. Mater.* **20**, 29–40 (2023).
64. X. P. Yu, Y. F. Wang, M. Zhang, H. S. Ma, C. Feng, B. J. Zhang, X. Wang, B. Ma, Q. Q. Yao, C. T. Wu, 3D printing of gear-inspired biomaterials: Immunomodulation and bone regeneration. *Acta Biomater.* **156**, 222–233 (2023).
65. B. Zhang, F. Han, Y. Wang, Y. Sun, M. Zhang, X. Yu, C. Qin, H. Zhang, C. Wu, Cells-micropatterning biomaterials for immune activation and bone regeneration. *Adv. Sci.* **9**, e2200670 (2022).
66. X. T. He, X. Li, M. Zhang, B. M. Tian, L. J. Sun, C. S. Bi, D. K. Deng, H. Zhou, H. L. Qu, C. Wu, F. M. Chen, Role of molybdenum in material immunomodulation and periodontal wound healing:

Targeting immunometabolism and mitochondrial function for macrophage modulation. *Biomaterials* **283**, 121439 (2022).

67. H. Cheng, H. Huang, Z. Guo, Y. Chang, Z. Li, Role of prostaglandin E2 in tissue repair and regeneration. *Theranostics* **11**, 8836–8854 (2021).
68. J. Pajarinen, T. Lin, E. Gibon, Y. Kohno, M. Maruyama, K. Nathan, L. Lu, Z. Yao, S. B. Goodman, Mesenchymal stem cell-macrophage crosstalk and bone healing. *Biomaterials* **196**, 80–89 (2019).
69. Y. R. Na, D. Jung, M. Stakenborg, H. Jang, G. J. Gu, M. R. Jeong, S. Y. Suh, H. J. Kim, Y. H. Kwon, T. S. Sung, S. B. Ryoo, K. J. Park, J. P. Im, J. Y. Park, Y. S. Lee, H. Han, B. Park, S. Lee, D. Kim, H. S. Lee, I. Cleyne, G. Matteoli, S. H. Seok, Prostaglandin E<sub>2</sub> receptor PTGER<sub>4</sub>-expressing macrophages promote intestinal epithelial barrier regeneration upon inflammation. *Gut* **70**, 2249–2260 (2021).
70. H. Chen, B. Hu, X. Lv, S. A. Zhu, G. H. Zhen, M. Wan, A. Jain, B. Gao, Y. Chai, M. Yang, X. Wang, R. X. Deng, L. Wang, Y. Cao, S. F. Ni, S. Liu, W. Yuan, H. J. Chen, X. Z. Dong, Y. Guan, H. L. Yang, X. Cao, Prostaglandin E2 mediates sensory nerve regulation of bone homeostasis. *Nat. Commun.* **10**, 181 (2019).
71. W. Qiao, D. Pan, Y. Zheng, S. Wu, X. Liu, Z. Chen, M. Wan, S. Feng, K. M. C. Cheung, K. W. K. Yeung, X. Cao, Divalent metal cations stimulate skeleton interoception for new bone formation in mouse injury models. *Nat. Commun.* **13**, 535 (2022).
72. O. Dolkart, T. Liron, O. Chechik, D. Somjen, T. Brosh, E. Maman, Y. Gabet, Statins enhance rotator cuff healing by stimulating the COX2/PGE2/EP4 pathway an in vivo and in vitro study. *Am. J. Sports Med.* **42**, 2869–2876 (2014).
73. P. Zhou, D. Xia, Z. Ni, T. Ou, Y. Wang, H. Zhang, L. Mao, K. Lin, S. Xu, J. Liu, Calcium silicate bioactive ceramics induce osteogenesis through oncostatin M. *Bioact. Mater.* **6**, 810–822 (2021).
74. H. Pan, L. Deng, L. Huang, Q. Zhang, J. Yu, Y. Huang, L. Chen, J. Chang, 3D-printed Sr<sub>2</sub>ZnSi<sub>2</sub>O<sub>7</sub> scaffold facilitates vascularized bone regeneration through macrophage immunomodulation. *Front. Bioeng. Biotechnol.* **10**, 1007535 (2022).

75. Y. Huang, C. Wu, X. Zhang, J. Chang, K. Dai, Regulation of immune response by bioactive ions released from silicate bioceramics for bone regeneration. *Acta Biomater.* **66**, 81–92 (2018).
76. A. I. Alford, K. D. Hankenson, Matricellular proteins: Extracellular modulators of bone development, remodeling, and regeneration. *Bone* **38**, 749–757 (2006).
77. Y. M. Bi, D. Ehirchiou, T. M. Kilts, C. A. Inkson, M. C. Embree, W. Sonoyama, L. Li, A. I. Leet, B. M. Seo, L. Zhang, S. T. Shi, M. F. Young, Identification of tendon stem/progenitor cells and the role of the extracellular matrix in their niche. *Nat. Med.* **13**, 1219–1227 (2007).
